# Supplementary figures and images for: Energy landscapes shape microbial communities in hydrothermal systems on the Arctic Mid-Ocean Ridge
Source: PubMed Central journal article supplement — ISME J. 2015 Jan 9;9(7):1593–606. doi: 10.1038/ismej.2014.247 (PMC4478700; doi:10.1038/ismej.2014.247), 2015-01-09

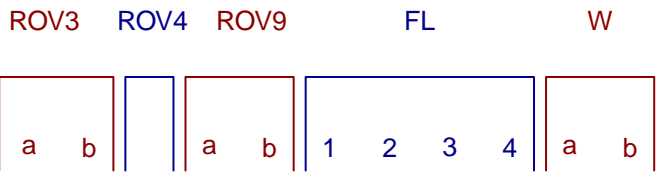

domain

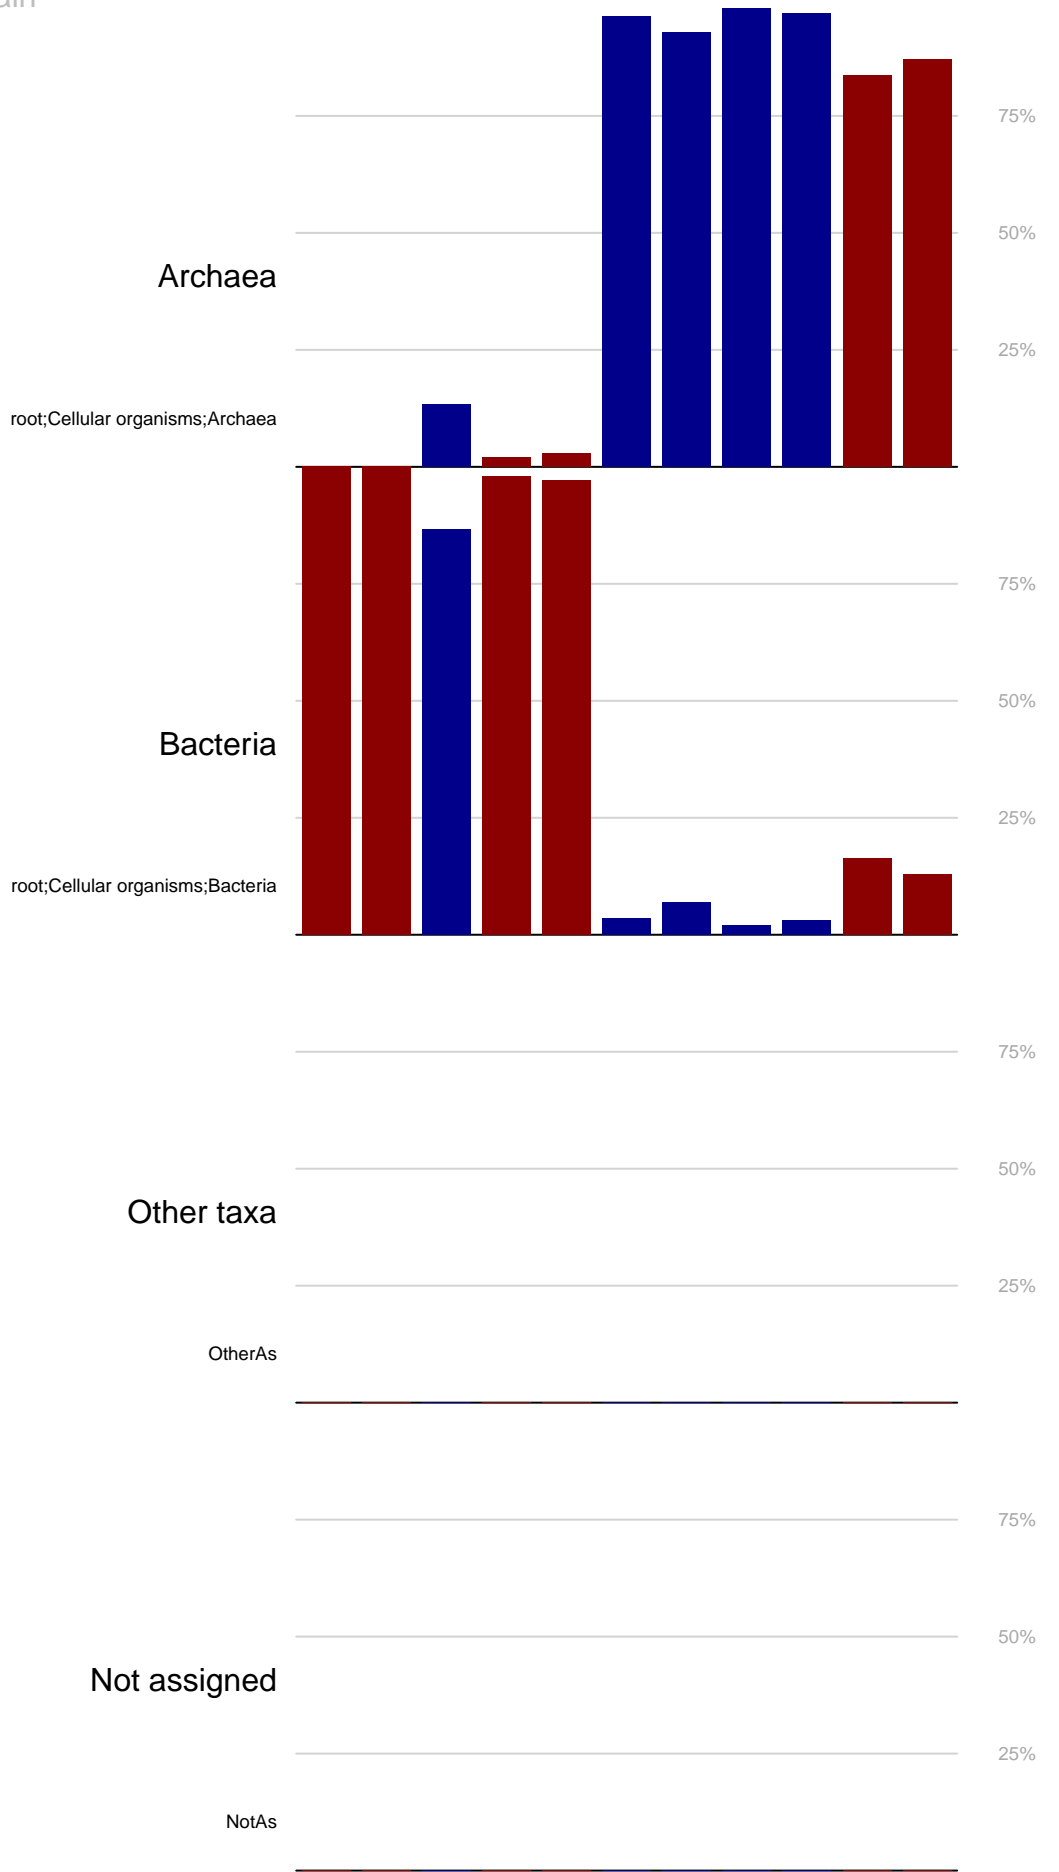

Supplement: ismej2014247x1.pdf [file ismej2014247x1.pdf]
